# Supplementary material for: Impact of climate change on backup energy and storage needs in wind-dominated power systems in Europe
Source: PLOS journal article supplement (doi:10.1371/journal.pone.0201457), 2018-08-22
Supplement: S1 (10.1371/journal.pone.0201457.s001) [file journal.pone.0201457.s001]

## Appendix 1: Supporting figures and tables for the methods section

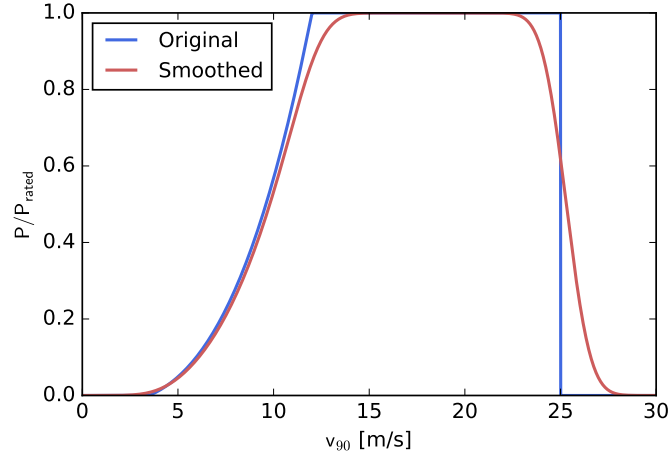

**Fig A. Power curve.** Power curve used to convert wind velocities in a height of 90 m ( $v_{90}$ ) to wind power generation data. In order to account for wind farms and velocity variations, the single turbine power curve (blue) is smoothed using a gaussian kernel (red).

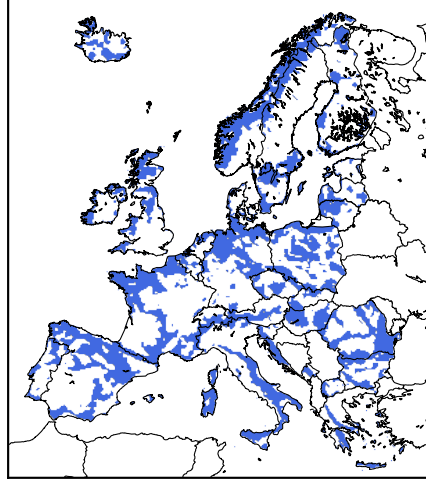

**Fig B. Placement of wind farms.** Wind farms are homogeneously placed on colored sites. On these sites the 31-year average of the wind yield is higher than the country average. For this derivation, ERA-Interim data [1] is used. In a sensitivity study, wind farms are placed homogeneously at each grid point inside a country (see Figs D-F in S4 Appendix).

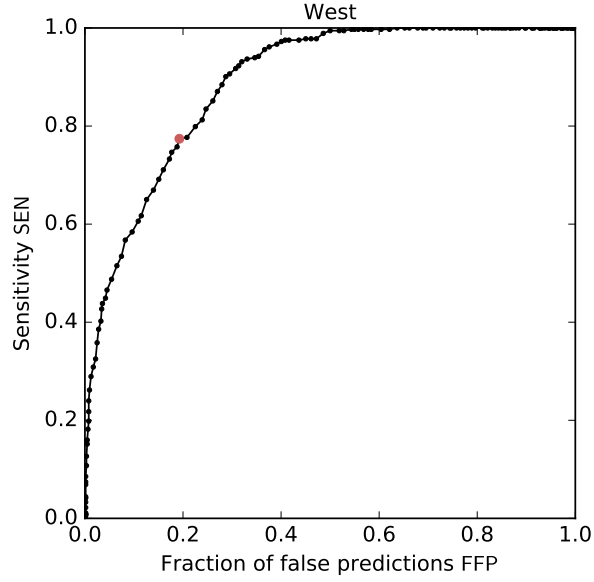

**Fig C. ROC curve.** Receiver operating characteristic (ROC) curve to assess the performance of the  $f$ -parameter to classify days with low wind power generation. For each pre-defined threshold value  $f_{th}$ , the sensitivity SEN and the fraction of false predictions FFP are calculated. The optimal value of  $f_{th}$  (red dot) minimizes the distance to the point  $(SEN, FFP) = (1,0)$ , which corresponds to a perfect classifier. Results are shown for the western CWT.

**Table A. Global circulation models used in the EURO-CORDEX ensemble.** The downscaled data has a resolution of  $0.11^\circ$  and 3 hours [2]. Table adapted from [3]

| Model name                                                                         | Institution                                                  |
|------------------------------------------------------------------------------------|--------------------------------------------------------------|
| CNRM-CM5 (CNRM Coupled Global Climate Model, version 5)                            | Centre National de Recherches Météorologiques (CNRM), France |
| EC-EARTH (EC-Earth Consortium)                                                     | European Consortium (EC)                                     |
| IPSL-CM5A-MR (IPSL Coupled Model, version 5, coupled with NEMO, medium resolution) | Institut Pierre Simon Laplace (IPSL), France                 |
| MPI-ESM-LR (MPI Earth System Model, low resolution)                                | Max Planck Institute (MPI) for Meteorology, Germany          |
| HadGEM2-ES (Hadley Centre Global Environment Model, version 2, Earth System)       | Met Office Hadley Centre, United Kingdom                     |

## References

1. Dee D, Uppala S, Simmons A, Berrisford P, Poli P, Kobayashi S, et al. The ERA-Interim reanalysis: Configuration and performance of the data assimilation system. *Quarterly Journal of the royal meteorological society*. 2011;137(656):553–597.
2. Jacob D, Petersen J, Eggert B, Alias A, Christensen OB, Bouwer LM, et al. EURO-CORDEX: new high-resolution climate change projections for European impact research. *Regional Environmental Change*. 2014;14(2):563–578. doi:10.1007/s10113-013-0499-2.
3. Reyers M, Moemken J, Pinto JG. Future changes of wind energy potentials over Europe in a large CMIP5 multi-model ensemble. *International Journal of Climatology*. 2016;36(2):783–796.
